# Supplementary material
Source: ML conference proceedings conference paper supplement (https://proceedings.neurips.cc/paper_files/paper/2020/hash/0987b8b338d6c90bbedd8631bc499221-Abstract.html)
Supplement: Supplementary file [file 0987b8b338d6c90bbedd8631bc499221-Supplemental.zip]

---

# Supplementary Material: Deep Structural Causal Models for Tractable Counterfactual Inference

---

Anonymous Author(s)

Affiliation

Address

email

## 1 A Synthetic Morpho-MNIST Experiment

### 2 A.1 Data Generation

3 We use the original MNIST dataset [1] together with the morphometric measurements introduced  
4 with Morpho-MNIST [2] to add functionality to measure intensity as well as set the intensity and  
5 thickness to a given value.

6 We implement MeasureIntensity by following the processing steps proposed by Castro et al. [2],  
7 and measure the intensity  $i$  of an image as the median intensity of pixels within the extracted binary  
8 mask. Once the intensity is measured, the entire image is rescaled to match the target intensity, with  
9 values clamped between 0 and 255 (images are assumed to be in unsigned 8-bit format).

10 Originally, Morpho-MNIST only proposed relative thinning and thickening operations. We expand  
11 those operations to absolute values by calculating the amount of dilation or erosion based on the ratio  
12 between target thickness and measured thickness.

13 Finally, we follow Eq. (7) to modify each image within the MNIST dataset and randomly split the  
14 original training set into a training and validation set. We show random samples from the resulting  
15 test set in Fig. A.1.

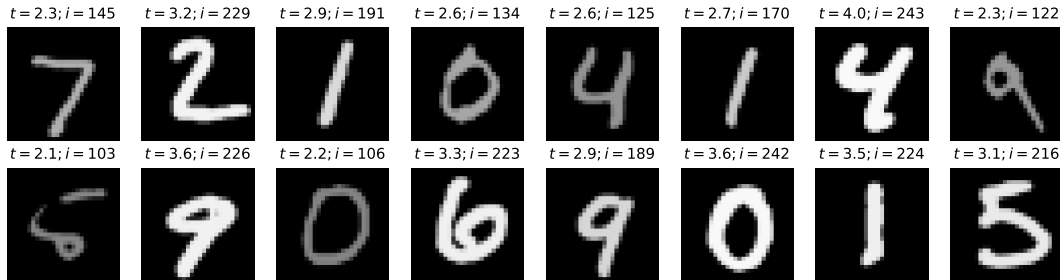

Figure A.1: Random exemplars from the synthetically generated Morpho-MNIST test dataset

### 16 A.2 Experimental Setup

17 We use (conditional) normalising flows for all variables apart from the images, which we model using  
18 (conditional) deep encoder-decoder architectures. The flows consist of components that constrain  
19 the support of the output distribution (where applicable) and components relevant for fitting the  
20 distribution. We use unit Gaussians as base distributions for all exogenous noise distributions  $P(\epsilon)$   
21 and, if available, we use the implementations in PyTorch [3] or Pyro [4] for all transformations.

22 Otherwise, we adapt the available implementations, referring to [5] for details. We indicate with  $\theta$   
 23 the modules with learnable parameters.

24 We model the mechanisms of the thickness  $t$  and intensity  $i$  as

$$t := f_T(\epsilon_T) = (\exp \circ \text{AffineNormalisation} \circ \text{Spline}_\theta)(\epsilon_T), \quad (\text{A.1})$$

$$i := f_I(\epsilon_I; t) = (\text{AffineNormalisation} \circ \text{sigmoid} \circ \text{ConditionalAffine}_\theta(\hat{t}))(\epsilon_I). \quad (\text{A.2})$$

25 In the independent model, where  $i$  is not conditioned on  $t$ , we use instead

$$i := f_I(\epsilon_I) = (\text{AffineNormalisation} \circ \text{sigmoid} \circ \text{Spline}_\theta \circ \text{Affine}_\theta)(\epsilon_I). \quad (\text{A.3})$$

26 We found that including normalisation layers help learning dynamics<sup>1</sup> and therefore include flows  
 27 to perform commonly used normalisation transformations. For doubly bounded variable  $y$  we learn  
 28 the flows in unconstrained space and then constrain them by a sigmoid transform and rescale to the  
 29 original range using fixed affine transformations with bias  $\min(Y)$  and scale  $[\max(Y) - \min(Y)]$ .  
 30 We constrain singly bounded values by applying an exponential transform to the unbounded values  
 31 and using an affine normalisation equivalent to a whitening operation in unbounded log-space. We  
 32 denote those fixed normalisation transforms as  $\text{AffineNormalisation}$  and use a hat to refer to the  
 33 unconstrained, normalised values (e.g.  $\widehat{\mathbf{p}}\mathbf{a}_k$ ). The  $\text{Spline}_\theta$  transformation refers to first-order neural  
 34 spline flows [5],  $\text{Affine}_\theta$  is an element-wise affine transformation, and  $\text{sigmoid}$  refers to the logistic  
 35 function.  $\text{ConditionalAffine}_\theta(\cdot)$  is a regular affine transform whose transformation parameters are  
 36 predicted by a context neural network taking  $\cdot$  as input. In the case of  $f_I(\epsilon_I; t)$ , the context network  
 37 is represented by a simple linear transform. Further, we model  $x$  using a low-level flow:

$$h_X(u_X; \mathbf{p}\mathbf{a}_X) = [\text{Preprocessing} \circ \text{ConditionalAffine}_\theta(\widehat{\mathbf{p}}\mathbf{a}_X)](u_X), \quad (\text{A.4})$$

38 where the  $\text{ConditionalAffine}$  transform practically reparametrises the noise distribution into another  
 39 Gaussian distribution and  $\text{Preprocessing}$  describes a fixed preprocessing transformation. We follow  
 40 the same preprocessing as used with RealNVP [6]. The context network for the conditional affine  
 41 transformation is the high-level mechanism  $g_X(z_X; \mathbf{p}\mathbf{a}_X)$  and is implemented as a decoder network  
 42 that outputs the bias for of the affine transformation, while the log-variance is fixed to  $\log \sigma^2 = -5$ .  
 43 We implement the decoder network as a CNN:

$$\begin{aligned} g_X(z_X; \mathbf{p}\mathbf{a}_X) = & (\text{Conv}_\theta(1; 1; 1; 0) \circ \text{ConvTranspose}_\theta(1; 4; 2; 1) \circ \text{ReLU} \circ \text{BN}_\theta \\ & \circ \text{ConvTranspose}_\theta(64; 4; 2; 1) \circ \text{Reshape}(64, 7, 7) \\ & \circ \text{ReLU} \circ \text{BN}_\theta \circ \text{Linear}_\theta(1024) \\ & \circ \text{ReLU} \circ \text{BN}_\theta \circ \text{Linear}_\theta(1024))([z_X, \widehat{\mathbf{p}}\mathbf{a}_X]), \end{aligned} \quad (\text{A.5})$$

44 where the operators describe neural network layers as follows: BN is batch normalisation; ReLU  
 45 the ReLU activation function;  $\text{Conv}(c; k; s; p)$  and  $\text{ConvTranspose}(c; k; s; p)$  are a convolution or  
 46 transposed convolution using a kernel with size  $k$ , a stride of  $s$ , a padding of  $p$  and outputting  $c$   
 47 channels;  $\text{Linear}(h)$  is a linear layer with  $h$  output neurons; and  $\text{Reshape}(\cdot)$  reshapes its inputs into  
 48 the given shape  $\cdot$ . Lastly,  $[z_X, \mathbf{p}\mathbf{a}_X]$  denotes the concatenation of  $z_X$  and  $\mathbf{p}\mathbf{a}_X$ , and  $z_X \in \mathbb{R}^{16}$ .

49 Equivalently, we implement the the encoder function as a simple CNN that outputs mean and  
 50 log-variance of a independent Gaussian:

$$\begin{aligned} e_X(x; \mathbf{p}\mathbf{a}_X) = & ([\text{Linear}_\theta(16), \text{Linear}_\theta(16)] \circ [\text{LeakyReLU}(0.1), \widehat{\mathbf{p}}\mathbf{a}_X] \\ & \circ \text{BN}_\theta \circ \text{Linear}_\theta(100) \circ \text{Reshape}(128 \cdot 7 \cdot 7) \\ & \circ \text{LeakyReLU}(0.1) \circ \text{BN}_\theta \circ \text{Conv}_\theta(128; 4; 2, 1) \\ & \circ \text{LeakyReLU}(0.1) \circ \text{BN}_\theta \circ \text{Conv}_\theta(64; 4; 2, 1))(x), \end{aligned} \quad (\text{A.6})$$

51 where  $\text{LeakyReLU}(\ell)$  is the leaky ReLU activation function with a leakiness of  $\ell$ .

52 We use Adam [7] for optimisation with batch size of 256 and a learning rate of  $10^{-4}$  for the encoder-  
 53 decoder and 0.005 for the covariate flows. We set the number of particles (MC samples) for estimating  
 54 the ELBO to 4. We use 32 MC samples for estimating reconstruction and counterfactuals. We train  
 55 all models for 1000 epochs and report the results of the model with the best validation loss.

<sup>1</sup>We observed that not normalising the inputs can lead to the deep models prioritising learning the dependence on the variable with largest magnitude. This phenomenon should be investigated further.

### 56 A.3 Additional Results

57 Here we further illustrate the associative, interventional, and counterfactual capabilities of the trained  
 58 independent, conditional, and full models.

#### 59 A.3.1 Association

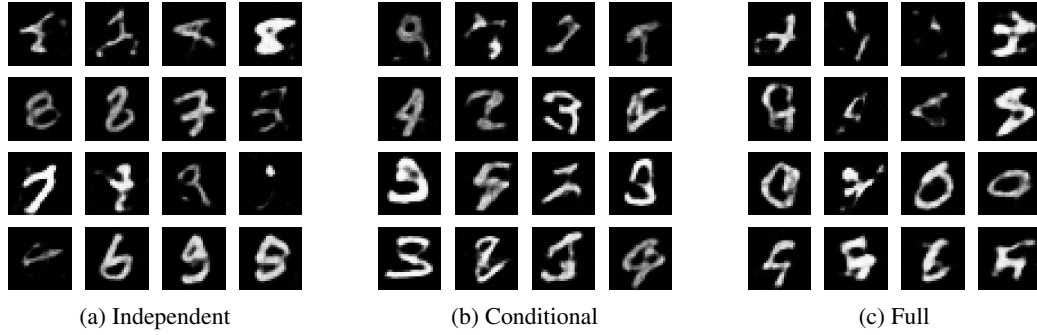

Figure A.2: Random samples generated by the independent, conditional and full model. Note how all models appear to have the same unconditional generation capacity.

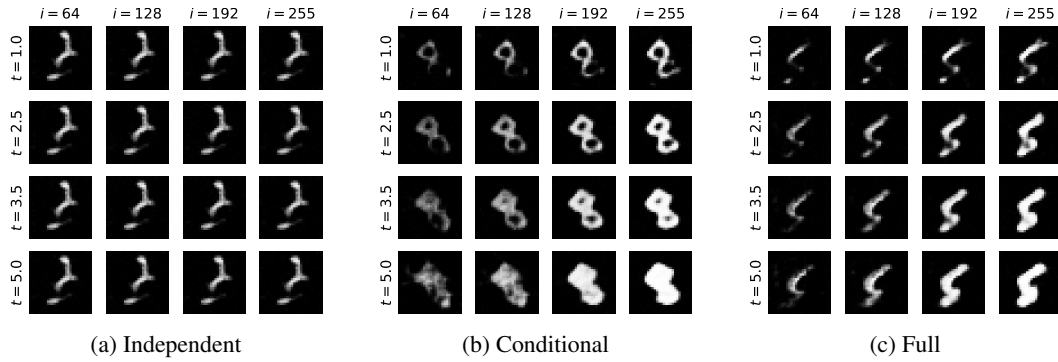

Figure A.3: Conditional samples generated by the independent, conditional, and full model. The high-level noise,  $z_X$ , is shared for all samples from each model, ensuring the same ‘style’ of the generated digit. The independent model generates images independent of the thickness and intensity values, resulting in identical samples. For the conditional and full models, thickness and intensity change consistently along each column and row, respectively.

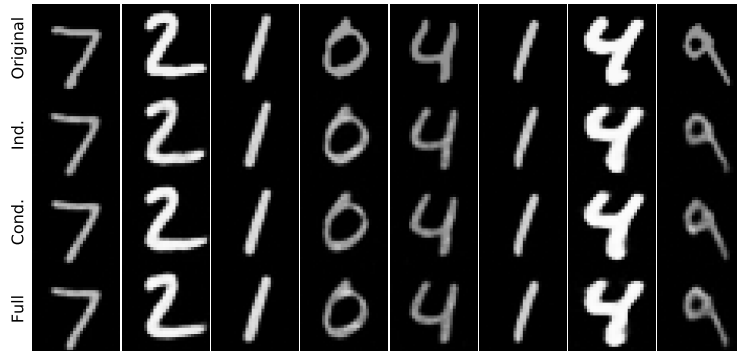

Figure A.4: Reconstructions. These are computed as Monte Carlo averages approximating  $\mathbb{E}_{Q(z_X|e_X(x;\mathbf{p}\mathbf{a}_X))}[g_X(z_X;\mathbf{p}\mathbf{a}_X)]$ , where  $e_X$  and  $g_X$  are the image encoder and decoder networks. All models seem capable of producing faithful reconstructions.

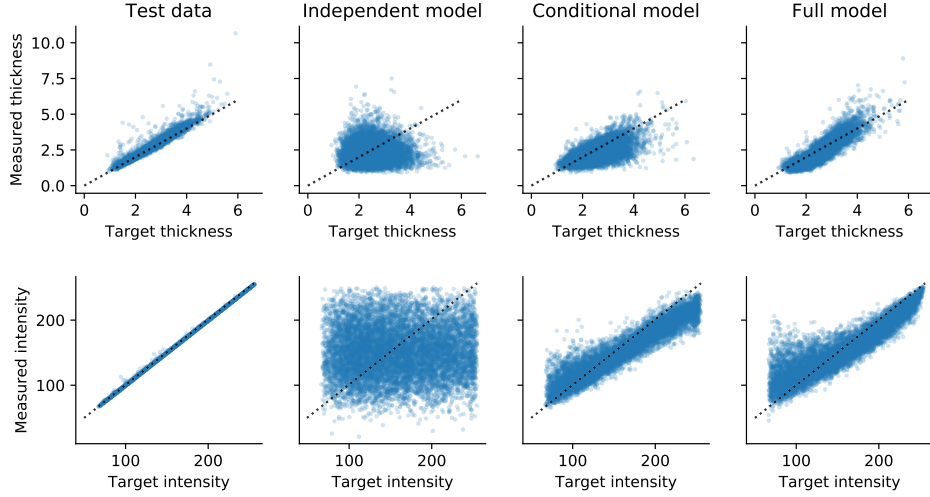

Figure A.5: Comparison of the target covariates and the corresponding values measured from the generated images. The leftmost column refers to the accuracy of the SetThickness and SetIntensity transforms used in generating the synthetic dataset, and the remaining three columns describe the fidelity of samples generated by each of the learned models. While images sampled from the independent model are trivially inconsistent with the sampled covariates, the conditional and full models show comparable conditioning performance.

### 60 A.3.2 Intervention

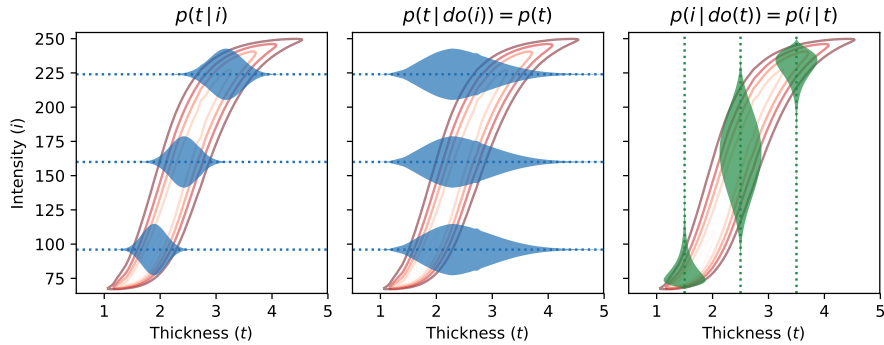

Figure A.6: Difference between conditioning and intervening, based on the trained full model. The joint density  $p(t, i)$  is shown as contours in the background, for reference, and the ‘violin’ shapes represent the density of one variable when conditioning or intervening on three different values of the other variable. Since  $t$  causes  $i$ , notice how  $p(t|i)$  (left) is markedly different from  $p(t|do(i))$  (middle), which collapses to  $p(t)$ . On the other hand,  $p(i|do(t))$  and  $p(i|t)$  (right) are identical.

### 61 A.3.3 Counterfactual

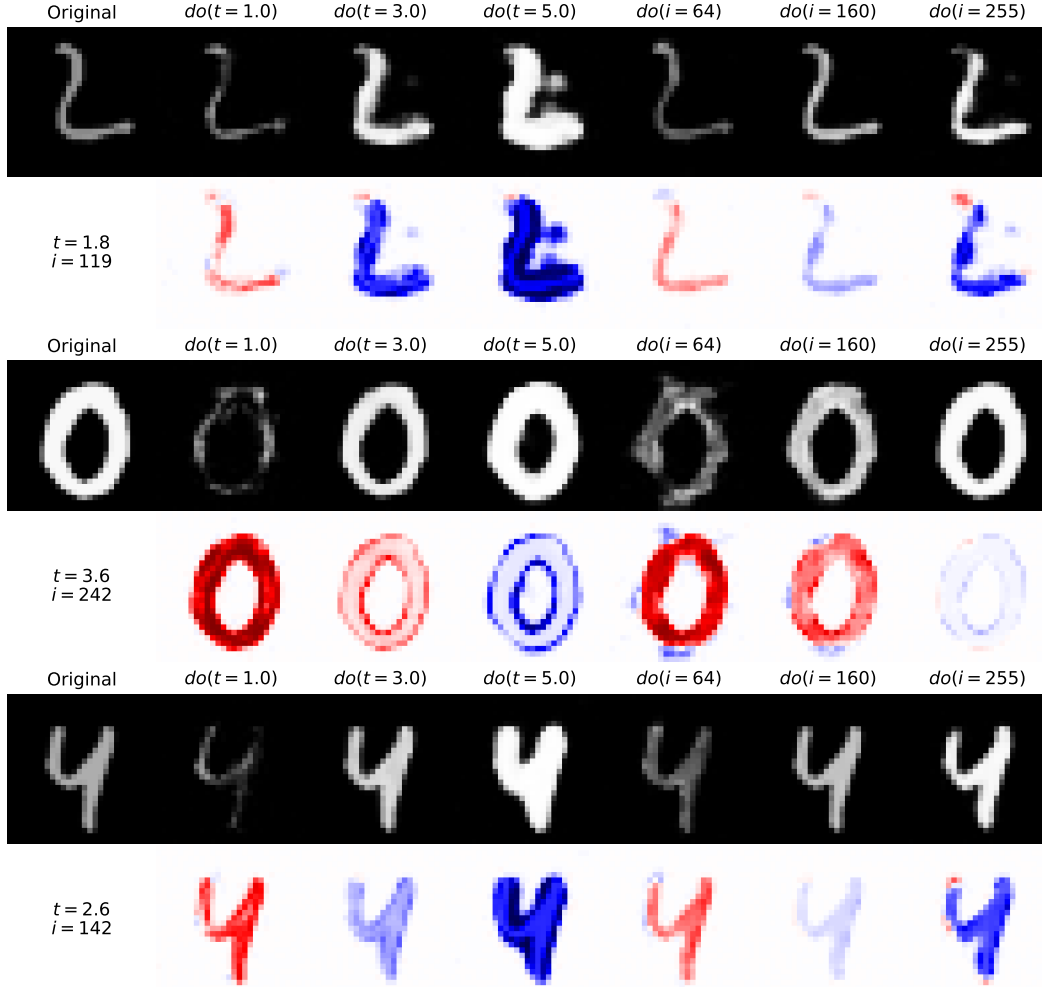

Figure A.7: Original samples and counterfactuals from the full model. The first column shows the original image and true values of the non-imaging data. The even rows show the difference maps between the original image and the corresponding counterfactual image. We observe that all counterfactuals preserve the digits' identity and style. Our model even generates sensible counterfactual images (with some artefacts) in very low-density regions, e.g. '0' with  $do(i = 64)$  (thick but dim), and very far from the original, e.g. '2' with  $do(t = 5.0)$ .

## 62 B Brain Modelling

### 63 B.1 Data Generation

64 The original three-dimensional (3D) T1-weighted brain MRI scans have been pre-processed by the  
 65 data providers of the UK Biobank Imaging study using the FSL neuroimaging toolkit [8]. The  
 66 pre-processing involves skull removal, bias field correction, and automatic segmentation of brain  
 67 structures. In addition, we have rigidly registered all scans to the standard MNI atlas space using an  
 68 in-house image registration tool, which enabled us to extract anatomically corresponding mid-axial  
 69 2D slices that were used for the experiments presented in this paper. The 2D slices were normalised in  
 70 intensity by mapping the minimum and maximum values inside the brain mask to the range  $[0, 255]$ .  
 71 Background pixels outside the brain were set to zero. Age and biological sex for each subject were  
 72 retrieved from the UK Biobank database along with the pre-computed brain and ventricle volumes.  
 73 These volumes are derived from the 3D segmentation maps obtained with FSL, and although these

are image-derived measurements, they may serve as reasonable proxies of the true measurements within our (simplified yet plausible) causal model of the physical manifestation of the brain anatomy.

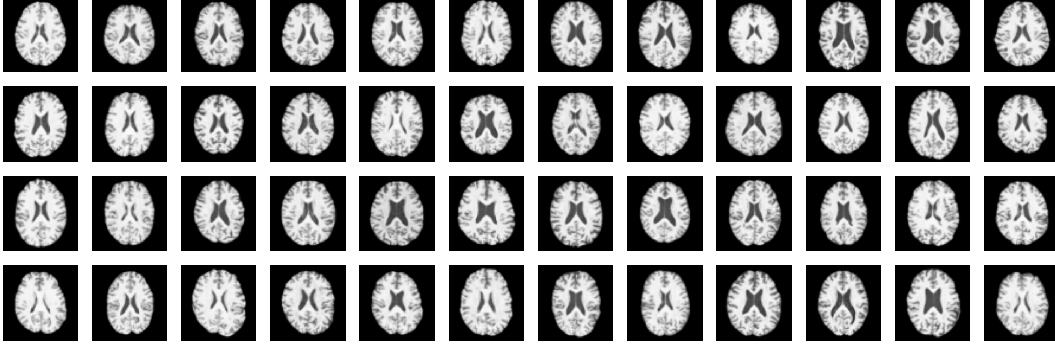

Figure B.1: Random exemplars from the test set of the adopted UK Biobank dataset

## B.2 Experimental Setup

The setup for the brain imaging experiment closely follows the MNIST example as described in Appendix A.2. We randomly split the available 13,750 brain images into train, validation and test sets with the respective ratios 70%, 15% and 15%. During training, we randomly crop the brain slices from their original size of  $233 \text{ px} \times 197 \text{ px}$  to  $192 \text{ px} \times 192 \text{ px}$  and use center crops during validation and testing. The cropped images are downsampled by a factor of 3 to a size of  $64 \text{ px} \times 64 \text{ px}$ .

We use the same low-level mechanism for the image  $x$  as with MNIST images but change the encoder and decoder functions to a deeper architecture with 5 scales consisting of 3 blocks of  $(\text{LeakyReLU}(0.1) \circ \text{BN}_{\theta} \circ \text{Conv}_{\theta})$  each as well as a linear layer that converts to and from the latent space with 100 dimensions. We directly learn the binary probability of the sex  $s$  and use the following invertible transforms to model the age  $a$ , brain volume  $b$ , and ventricle volume  $v$  as

$$a := f_A(\epsilon_A) = (\exp \circ \text{AffineNormalisation} \circ \text{Spline}_{\theta})(\epsilon_A), \quad (\text{B.1})$$

$$b := f_B(\epsilon_B; s, a) = (\exp \circ \text{AffineNormalisation} \circ \text{ConditionalAffine}_{\theta}([s, \hat{a}]))(\epsilon_B), \quad (\text{B.2})$$

$$v := f_V(\epsilon_V; a, b) = (\exp \circ \text{AffineNormalisation} \circ \text{ConditionalAffine}_{\theta}([\hat{b}, \hat{a}]))(\epsilon_V), \quad (\text{B.3})$$

where the context networks are implemented as a fully-connected network with 8 and 16 hidden units, and a LeakyReLU(0.1) nonlinearity.

## B.3 Additional Results

Likewise, we present more detailed analyses of the model trained on UK Biobank brain images and covariates, in terms of modelling the observational distribution and computing various counterfactual queries. (Continued on the next page.)

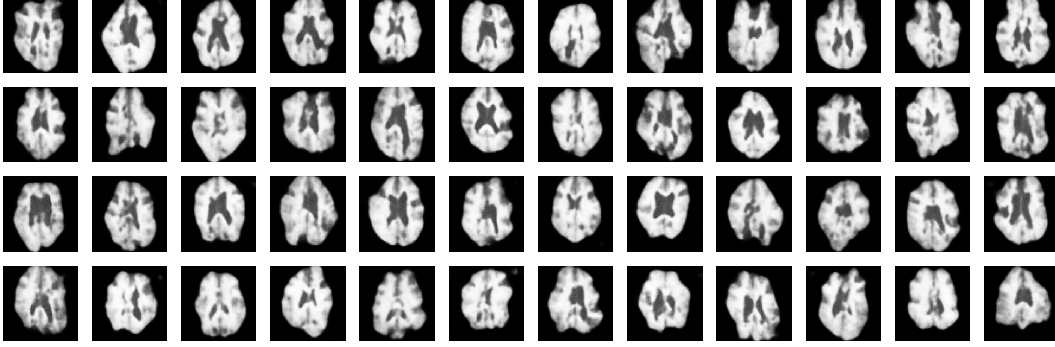

Figure B.2: Random samples from the model trained on the UK Biobank dataset

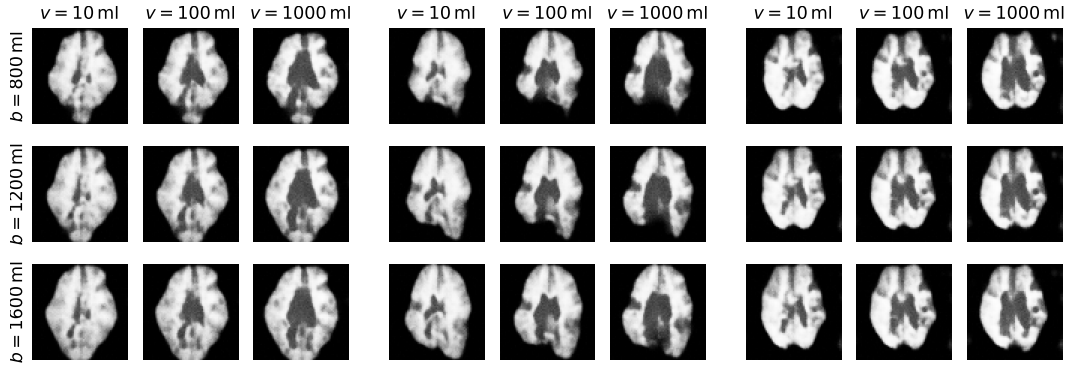Figure B.3: Conditional samples from the model trained on the UK Biobank dataset. Images in each  $3 \times 3$  block share the same the high-level noise vector,  $z_X$ . Each row consistently changes the brain size, whereas each column changes the ventricle volume.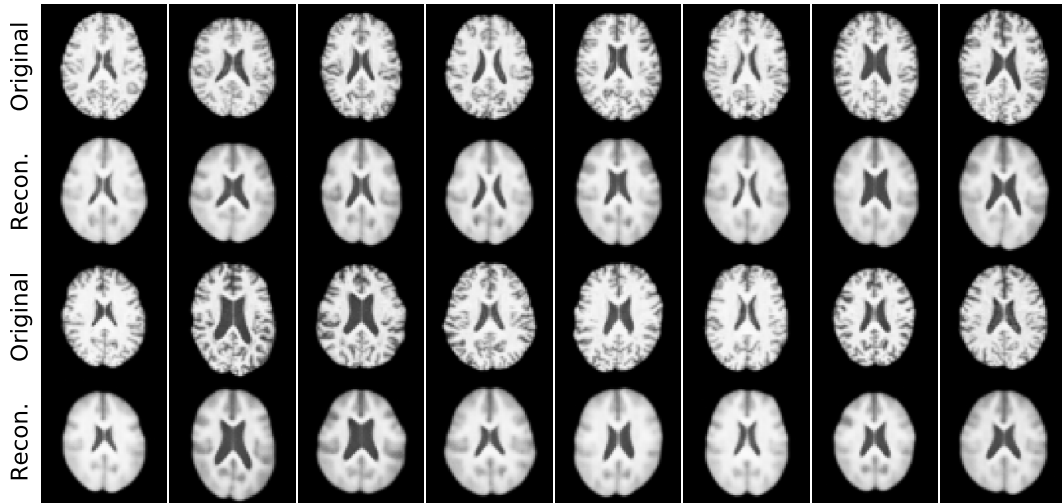

Figure B.4: Original samples and reconstructions from the model trained on the UK Biobank dataset

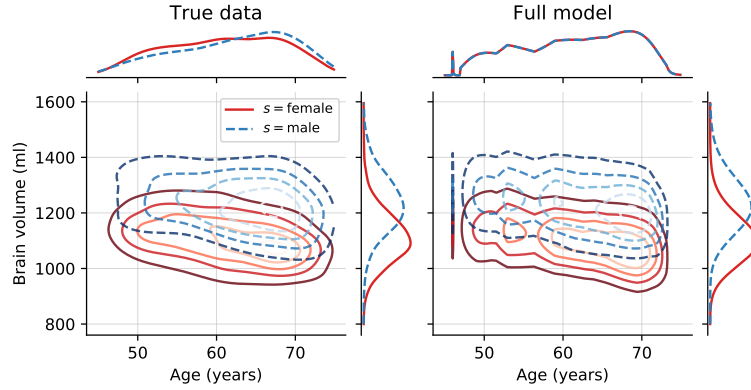

(a) Age vs. brain volume:  $p(a, b | s)$ . Here we see differences in head size across biological sexes (reflected in brain volume), as well as a downward trend in brain volume as age progresses.

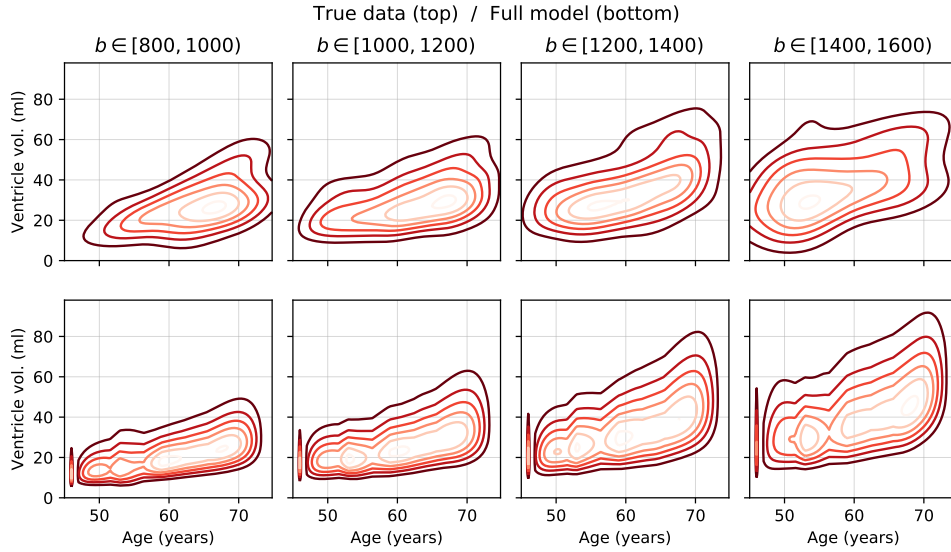

(b) Age vs. ventricle volume:  $p(a, v | b \in \cdot)$ . As expected from the literature [9], we observe a consistent increase in ventricle volume with age, in addition to a proportionality relationship with the overall brain volume.

Figure B.5: Densities for the true data (KDE) and for the learned model. The overall trends and interactions present in the true data distribution seem faithfully captured by the model.



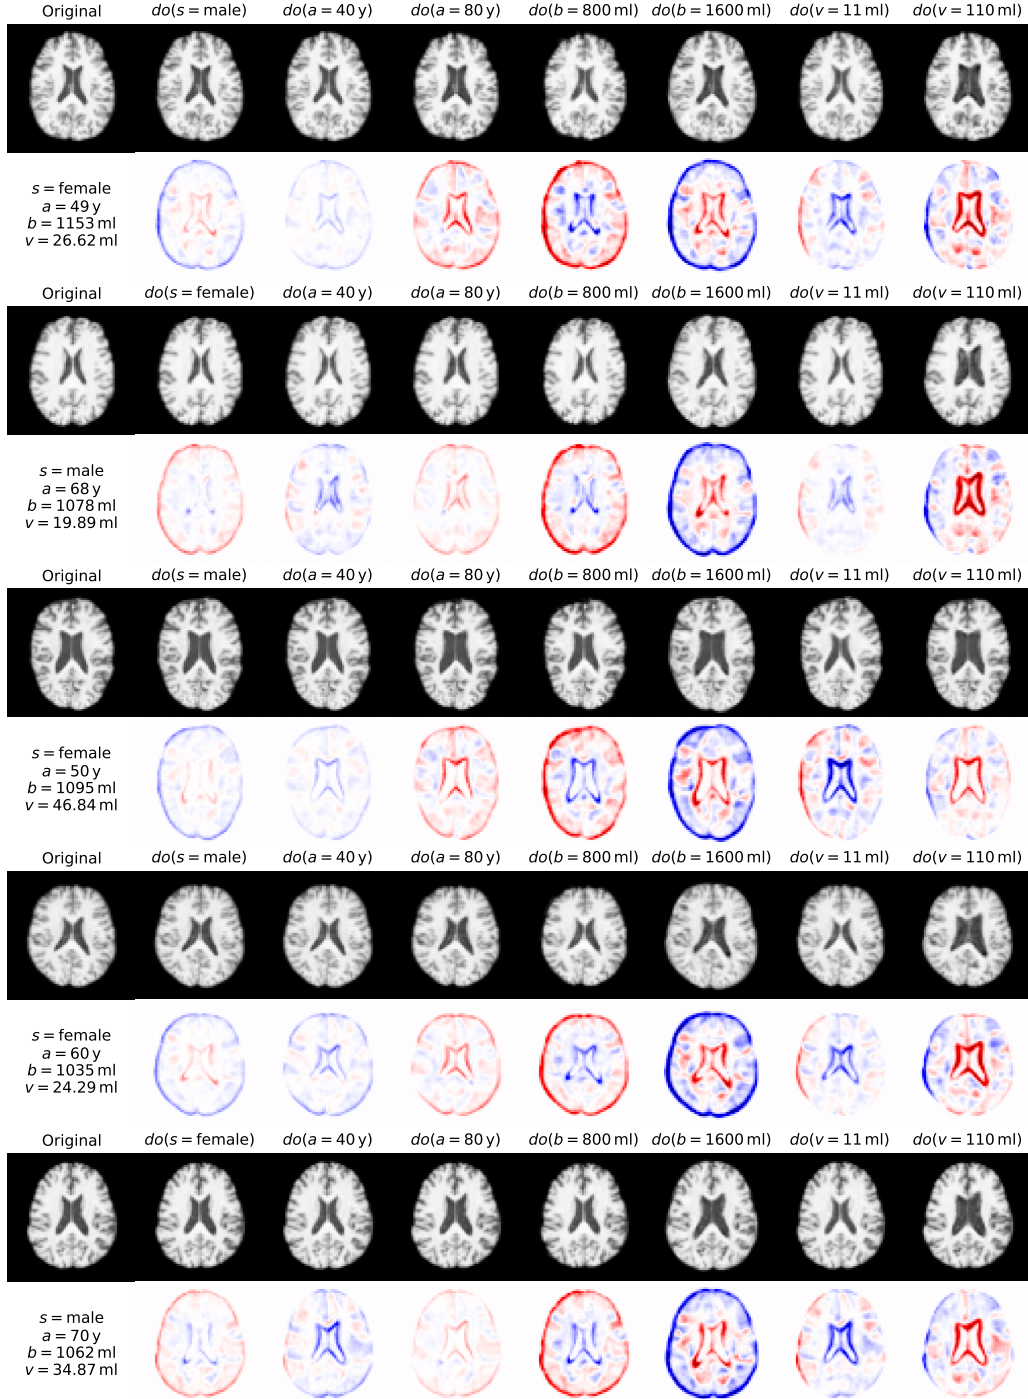

Figure B.6: Original samples and counterfactuals from the model trained on the UK Biobank dataset. The first column shows the original image and true values of the non-imaging data. The even rows show the difference maps between the original image and the corresponding counterfactual image.

## 95 C Discrete counterfactuals

96 As mentioned in the main text, the DSCM framework supports not only low- and high-dimensional  
 97 continuous data, but also discrete variables. In particular, discrete mechanisms with a Gumbel–max  
 98 parametrisation have been shown to lead to counterfactuals satisfying desirable properties [10]. For  
 99 example, they are invariant to category permutations and are stable, such that increasing the odds only  
 100 of the observed outcome cannot produce a different counterfactual outcome. More computational  
 101 details and properties of the Gumbel distribution are found in Maddison and Tarlow [11].

102 Consider a discrete random variable over  $K$  categories,  $y$ , with a conditional likelihood described by  
 103 logits  $\lambda$ , assumed to be a function  $g_Y$  of its parents,  $\mathbf{pa}_Y$ :

$$P(y = k | \mathbf{pa}_Y) = \frac{e^{\lambda_k}}{\sum_{l=1}^K e^{\lambda_l}}, \quad \lambda = g_Y(\mathbf{pa}_Y). \quad (\text{C.1})$$

104 Under the Gumbel–max parametrisation, the mechanism generating  $y$  can be described as

$$y := f_Y(\epsilon_Y; \mathbf{pa}_Y) = \arg \max_{1 \leq l \leq K} (\epsilon_Y^l + \lambda_l), \quad \epsilon_Y^l \sim \text{Gumbel}(0, 1). \quad (\text{C.2})$$

105 Samples from the  $\text{Gumbel}(0, 1)$  distribution can be generated by computing  $-\log(-\log U)$ , where  
 106  $U \sim \text{Unif}(0, 1)$ .

107 The Gumbel distribution has certain special properties [11] that enable tractable abduction. Given  
 108 that we observed  $y = k$ , samples can be generated from the exact posterior  $P(\epsilon_Y | y = k, \mathbf{pa}_Y)$ :

$$\begin{aligned} \epsilon_Y^k &= G_k + \log \sum_l e^{\lambda_l} - \lambda_k, & G_k &\sim \text{Gumbel}(0, 1), \\ \epsilon_Y^l &= -\log(e^{-G_l - \lambda_l} + e^{-\epsilon_Y^k - \lambda_k}) - \lambda_l, & G_l &\sim \text{Gumbel}(0, 1), \quad \forall l \neq k. \end{aligned} \quad (\text{C.3})$$

109 Finally, given an upstream counterfactual intervention such that  $\tilde{\lambda} = \tilde{g}_Y(\tilde{\mathbf{pa}}_Y)$ , the counterfactual  
 110 outcome for  $y$  can be determined simply as

$$y = f_Y(\epsilon_Y; \tilde{\mathbf{pa}}_Y) = \arg \max_{1 \leq l \leq K} (\epsilon_Y^l + \tilde{\lambda}_l). \quad (\text{C.4})$$

111 Note that this entire derivation applies to a truly discrete variable, without the need for continuous  
 112 relaxations as commonly used in deep generative models [12, 13], as the likelihood is given in closed  
 113 form and no gradients of expectations are necessary.

## 114 References

- 115 [1] Yann LeCun, Léon Bottou, Yoshua Bengio, and Patrick Haffner. Gradient-based learning  
 116 applied to document recognition. *Proceedings of the IEEE*, 86(11):2278–2324, 1998. doi:  
 117 10.1109/5.726791.
- 118 [2] Daniel C. Castro, Jeremy Tan, Bernhard Kainz, Ender Konukoglu, and Ben Glocker. Morpho-  
 119 MNIST: Quantitative assessment and diagnostics for representation learning. *Journal of*  
 120 *Machine Learning Research*, 20(178), 2019.
- 121 [3] Adam Paszke, Sam Gross, Francisco Massa, Adam Lerer, James Bradbury, Gregory Chanan,  
 122 Trevor Killeen, Zeming Lin, Natalia Gimelshein, Luca Antiga, Alban Desmaison, Andreas  
 123 Kopf, Edward Yang, Zachary DeVito, Martin Raison, Alykhan Tejani, Sasank Chilamkurthy,  
 124 Benoit Steiner, Lu Fang, Junjie Bai, and Soumith Chintala. PyTorch: An imperative style,  
 125 high-performance deep learning library. In *Advances in Neural Information Processing Systems*  
 126 *32 (NeurIPS 2019)*, pages 8024–8035, 2019.
- 127 [4] Eli Bingham, Jonathan P. Chen, Martin Jankowiak, Fritz Obermeyer, Neeraj Pradhan, Theofanis  
 128 Karaletsos, Rohit Singh, Paul Szerlip, Paul Horsfall, and Noah D. Goodman. Pyro: Deep  
 129 universal probabilistic programming. *Journal of Machine Learning Research*, 20(28), 2019.
- 130 [5] Conor Durkan, Artur Bekasov, Iain Murray, and George Papamakarios. Neural spline flows.  
 131 In *Advances in Neural Information Processing Systems 32 (NeurIPS 2019)*, pages 7511–7522,  
 132 2019.

- 133 [6] Laurent Dinh, Jascha Sohl-Dickstein, and Samy Bengio. Density estimation using real nvp,  
134 2016. URL <https://arxiv.org/abs/1605.08803>.
- 135 [7] Diederik P Kingma and Jimmy Ba. Adam: A method for stochastic optimization. *arXiv preprint*  
136 *arXiv:1412.6980*, 2014.
- 137 [8] Fidel Alfaro-Almagro, Mark Jenkinson, Neal K. Bangerter, Jesper L. R. Andersson, Ludovica  
138 Griffanti, Gwenaëlle Douaud, Stamatios N. Sotiropoulos, Saad Jbabdi, Moises Hernandez-  
139 Fernandez, Emmanuel Vallee, et al. Image processing and quality control for the first 10,000  
140 brain imaging datasets from UK Biobank. *NeuroImage*, 166:400–424, 2018.
- 141 [9] Ruth Peters. Ageing and the brain. *Postgraduate Medical Journal*, 82(964):84–88, 2006.
- 142 [10] Michael Oberst and David Sontag. Counterfactual off-policy evaluation with Gumbel-Max  
143 structural causal models. In *Proceedings of the 36th International Conference on Machine*  
144 *Learning*, volume 97 of *PMLR*, pages 4881–4890. PMLR, 2019.
- 145 [11] Chris J. Maddison and Daniel Tarlow. Gumbel machinery, jan 2017. URL [https://cmaddis.](https://cmaddis.github.io/gumbel-machinery)  
146 [github.io/gumbel-machinery](https://cmaddis.github.io/gumbel-machinery).
- 147 [12] Eric Jang, Shixiang Gu, and Ben Poole. Categorical reparameterization with Gumbel-softmax.  
148 In *International Conference on Learning Representations*, 2017. URL [https://openreview.](https://openreview.net/forum?id=rkE3y85ee)  
149 [net/forum?id=rkE3y85ee](https://openreview.net/forum?id=rkE3y85ee).
- 150 [13] Chris J. Maddison, Andriy Mnih, and Yee Whye Teh. The Concrete distribution: A con-  
151 tinuous relaxation of discrete random variables. In *International Conference on Learning*  
152 *Representations*, 2017. URL <https://openreview.net/forum?id=S1jE5L5gl>.
